# Supplementary material for: Diffuse multiphase coexistence renders temperature-insensitive lead-free energy-harvesting piezoceramics
Source: Royal Society of Chemistry journal article supplement (doi:10.1039/d2ta08962a), 2023-01-01
Supplement: d2ta08962a1.pdf [file d2ta08962a1.pdf]

## Support Information

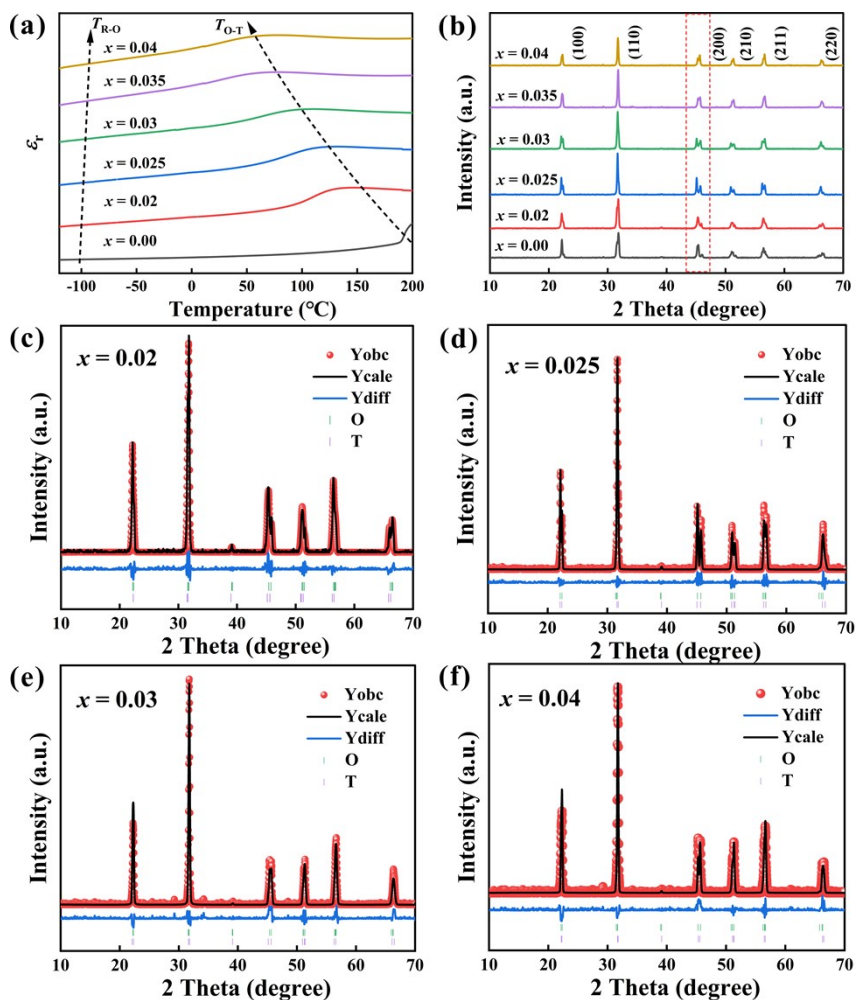

**Fig. S1** (a) The  $\epsilon_r$ - $T$  curves of  $(1-x)\text{KNN}-x\text{BLZ}$  ceramics measured between  $-120$ - $200$   $^{\circ}\text{C}$ ; (b) The XRD patterns of  $(1-x)\text{KNN}-x\text{BLZ}$  ceramics with different  $x$  contents; (c-f) The Rietveld refinement on XRD patterns of  $x = 0.02, x = 0.025, x = 0.03$  and  $x = 0.04$  samples.

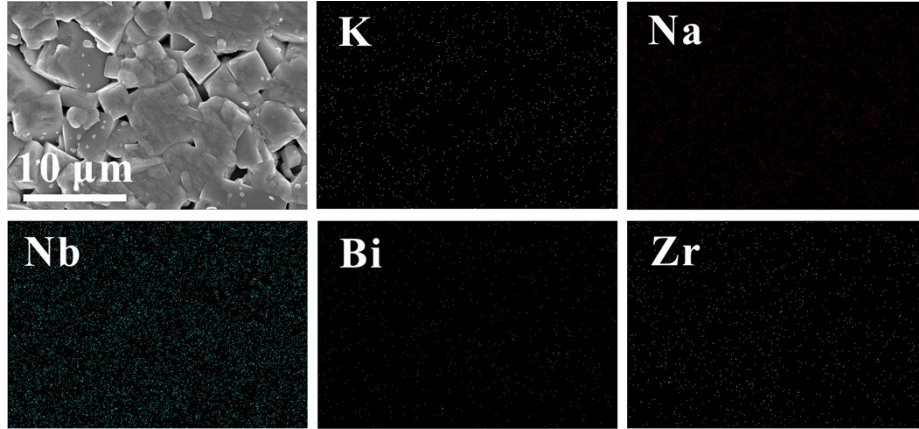

**Fig. S2** The SEM photo and element mapping of  $x = 0.035$  sample.

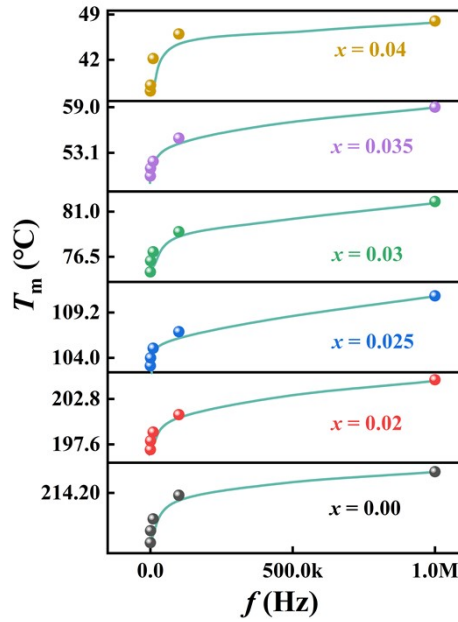

**Fig. S3** Vogel-Fulcher fitting curves of  $(1-x)\text{KNN}-x\text{BLZ}$  ceramics.

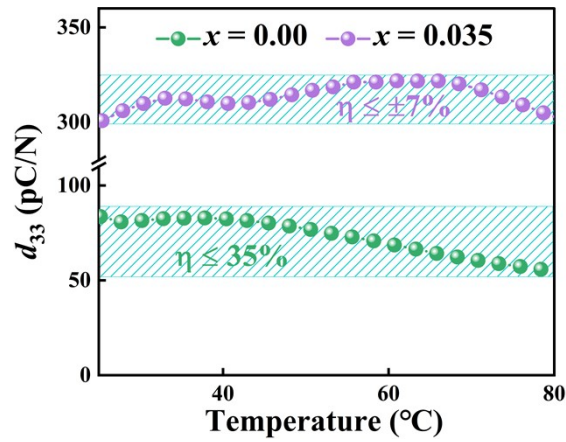

**Fig. S4** The  $d_{33}$  as a function of temperature for  $x = 0.00$  and  $x = 0.035$ .

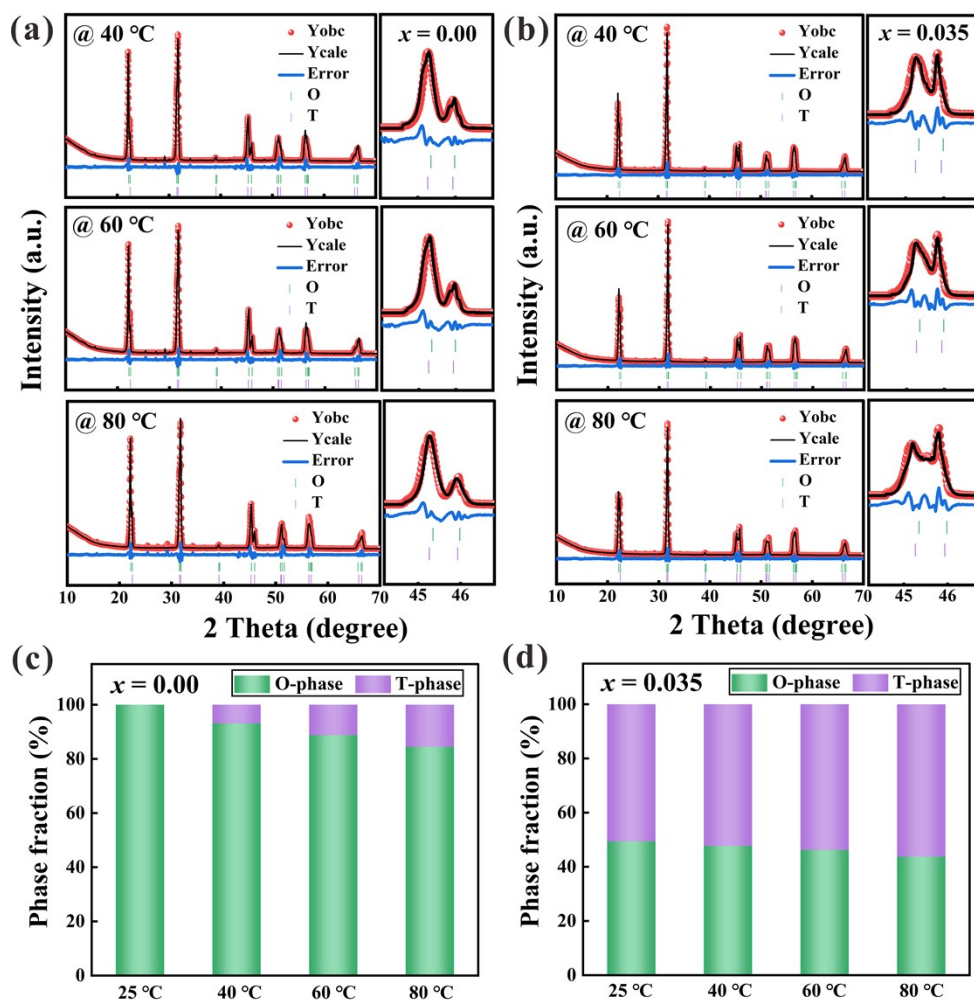

**Fig. S5** (a-b) The Rietveld refinements on XRD patterns of  $x = 0.00$  and  $x = 0.035$  samples at the temperature range of 40-80 °C; (c-d) The corresponding phase composition of  $x = 0.00$  and  $x = 0.035$  samples under variable temperature condition.

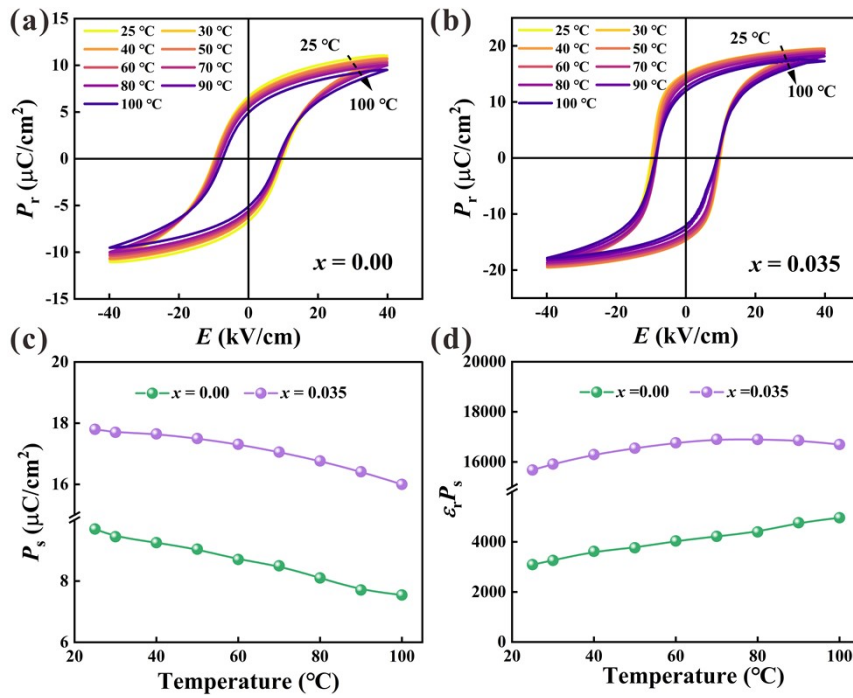

**Fig. S6** (a-b) The variable temperature  $P$ - $E$  loops of  $x = 0.00$  and  $x = 0.035$  samples;  
 (c-d) The  $P_s$  and  $\epsilon_r P_s$  as a function of temperature for  $x = 0.00$  and  $x = 0.035$ .

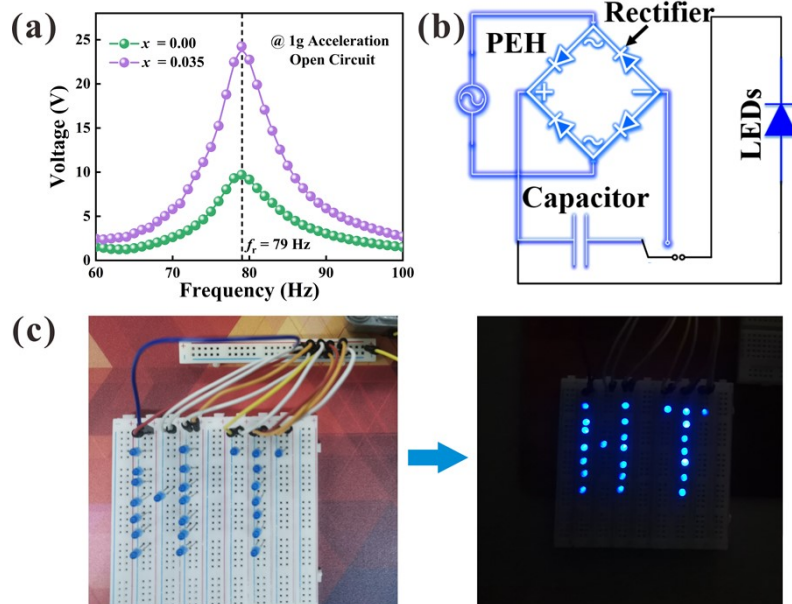

**Fig. S7** The relationship between the open circuit voltage and frequency of the cantilever PEH prepared by the  $x = 0.00$  and  $x = 0.035$  samples; (b) The schematic of the charging-discharging circuit integrated with a full-wave rectifying bridge; (c) The 24 LEDs lit up by the electrolytic capacitor charged with  $x = 0.035$  PEH at 80 °C.
